# Supplementary material for: A stimulus-responsive hexahedron DNA framework facilitates targeted and direct delivery of native anticancer proteins into cancer cells
Source: Royal Society of Chemistry journal article supplement (doi:10.1039/d2sc02858a), 2022-01-01
Supplement: d2sc02858a1.pdf [file d2sc02858a1.pdf]

## Supplementary Information

### **Stimulus-responsive hexahedron DNA framework facilitates targeted and direct delivery of native anticancer protein into cancer cells**

**Wenjiao Zhou,<sup>a</sup> Fang Yang,<sup>b</sup> Shunmei Li,<sup>b</sup> Ruo Yuan<sup>b</sup> and Yun Xiang<sup>\*b</sup>**

<sup>a</sup> *School of Chemistry and Chemical Engineering, Chongqing University of Technology, Chongqing 400054, P. R. China*

<sup>b</sup> *Key Laboratory of Luminescent and Real-Time Analytical Chemistry, Ministry of Education, School of Chemistry and Chemical Engineering, Southwest University, Chongqing 400715, P. R. China*

*E-mail: yunatswu@swu.edu.cn (Y. Xiang).*
